# Supplementary material for: Assessment of the importance and catalytic role of chromium oxide and chromium carbide for hydrogen generation via hydrolysis of magnesium
Source: Royal Society of Chemistry journal article supplement (doi:10.1039/d4nr02760d), 2024-01-01
Supplement: d4nr02760d1.pdf [file d4nr02760d1.pdf]

## Supporting Information

### **The assessment of the importance and the role of chromium oxide and chromium carbide for hydrogen generation via hydrolysis of Magnesium**

Fei Qin<sup>1</sup>, Yue Zhang<sup>1</sup>, Kashif Naseem<sup>1, \*</sup>, Zhanjun Chen<sup>1</sup>, Guoquan Suo<sup>2, \*\*</sup>, Waseem Hayat<sup>3</sup>, Syed Hamza Safeer Gardezi<sup>4</sup>

1 School of Materials and Environmental Engineering, Hunan University of Humanities Science and Technology, Loudi 417000, China.

2 School of Materials Science and Engineering, Shaanxi University of Science and Technology, Weiyang, Xian, Shaanxi 710021, PR China

3 School of Environment and Energy; South China University of Technology, Guangzhou 510006, China.

3 Materials Science Laboratory, Department of Physics, Quaid-i-Azam University, Islamabad, 45320, Pakistan.

Corresponding authors:

Kashif Naseem

\*Email: [kashifsatti010@gmail.com](mailto:kashifsatti010@gmail.com), [kashifnaseem@huhst.edu.cn](mailto:kashifnaseem@huhst.edu.cn)

Guoquan Suo

\*\*Email: [suoguoquan@sust.edu.cn](mailto:suoguoquan@sust.edu.cn)

| <b>Composites</b>                      | <b>Seawater</b> | <b>0.5 M MgCl<sub>2</sub> Solution</b> |
|----------------------------------------|-----------------|----------------------------------------|
| Mg-1wt%Cr <sub>2</sub> O <sub>3</sub>  | 102             | 245.6                                  |
| Mg-3wt%Cr <sub>2</sub> O <sub>3</sub>  | 567.8           | 717.6                                  |
| Mg-5wt%Cr <sub>2</sub> O <sub>3</sub>  | 695             | 754.6                                  |
| Mg-10wt%Cr <sub>2</sub> O <sub>3</sub> | 798             | 812                                    |
| Mg-15wt%Cr <sub>2</sub> O <sub>3</sub> | 775.6           | ----                                   |
| Mg-1wt%Cr <sub>3</sub> C <sub>2</sub>  | 470             | 722.5                                  |
| Mg-3wt%Cr <sub>3</sub> C <sub>2</sub>  | 636             | 767                                    |
| Mg-5wt%Cr <sub>3</sub> C <sub>2</sub>  | 761             | 790                                    |
| Mg-10wt%Cr <sub>3</sub> C <sub>2</sub> | 821             | 831.6                                  |
| Mg-15wt%Cr <sub>3</sub> C <sub>2</sub> | 782             | -----                                  |

Hydrogen yield with different wt% contents of Cr<sub>2</sub>O<sub>3</sub> and Cr<sub>3</sub>C<sub>2</sub> with seawater and 0.5 M MgCl<sub>2</sub> solution

| <b>Composites</b>                      | <b>MgCl<sub>2</sub> 0.1 M</b> | <b>MgCl<sub>2</sub> 0.25 M</b> | <b>MgCl<sub>2</sub> 0.5 M</b> |
|----------------------------------------|-------------------------------|--------------------------------|-------------------------------|
| Mg-10wt%Cr <sub>2</sub> O <sub>3</sub> | 772.2                         | 795                            | 812                           |
| Mg-10wt%Cr <sub>3</sub> C <sub>2</sub> | 782.6                         | 805                            | 831.6                         |

Hydrogen yield with different molar concentration of MgCl<sub>2</sub> after 1 h ball milling

| <b>Composites</b>                      | <b>0.25 h</b> | <b>0.5 h</b> | <b>0.75 h</b> | <b>1 h</b> | <b>3 h</b> |
|----------------------------------------|---------------|--------------|---------------|------------|------------|
| Mg-10wt%Cr <sub>2</sub> O <sub>3</sub> | 110.6         | 312.9        | 588           | 798        | 706        |
| Mg-10wt%Cr <sub>3</sub> C <sub>2</sub> | 410.2         | 620.8        | 734.1         | 821        | 790        |

Comparison of hydrogen yield of Mg-10wt%Cr<sub>2</sub>O<sub>3</sub> and Mg-10wt%Cr<sub>3</sub>C<sub>2</sub> with different ball milling 0.25 h-3 h
